RESEARCH ARTICLE

# Fate of tenogenic differentiation potential of human bone marrow stromal cells by uniaxial stretching affected by stretch-activated calcium channel agonist gadolinium

Hui Yin Nam<sup>1\*</sup>, Hanumantha Rao Balaji Raghavendran<sup>1</sup>, Belinda Pinguang-Murphy<sup>2</sup>, Azlina A. Abbas<sup>1</sup>, Azhar M. Merican<sup>1</sup>, Tunku Kamarul<sup>1\*</sup>

**1** Tissue Engineering Group, Department of Orthopaedic Surgery (NOCERAL), Faculty of Medicine, University of Malaya, Kuala Lumpur, Malaysia, **2** Department of Biomedical Engineering, Faculty of Engineering, University of Malaya, Kuala Lumpur, Malaysia

\* [huiyin26@yahoo.com](mailto:huiyin26@yahoo.com) (HYN); [tkzrea@um.edu.my](mailto:tkzrea@um.edu.my) (TK)

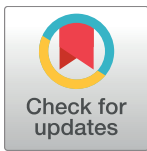

**OPEN ACCESS**

**Citation:** Nam HY, Balaji Raghavendran HR, Pinguang-Murphy B, Abbas AA, Merican AM, Kamarul T (2017) Fate of tenogenic differentiation potential of human bone marrow stromal cells by uniaxial stretching affected by stretch-activated calcium channel agonist gadolinium. *PLoS ONE* 12(6): e0178117. <https://doi.org/10.1371/journal.pone.0178117>

**Editor:** Stan Gronthos, The University of Adelaide, AUSTRALIA

**Received:** January 10, 2017

**Accepted:** May 6, 2017

**Published:** June 27, 2017

**Copyright:** © 2017 Nam et al. This is an open access article distributed under the terms of the [Creative Commons Attribution License](https://creativecommons.org/licenses/by/4.0/), which permits unrestricted use, distribution, and reproduction in any medium, provided the original author and source are credited.

**Data Availability Statement:** All relevant data are within the paper.

**Funding:** This work was supported by High Impact Research – Ministry of Education, HIR-MoE Grant (Reference number - UM.C/625/1/HIR/ MOHE/ CHAN/03, account number - A000003-50001). We also thank the University of Malaya for a PhD thesis scholarship for the first author. The funders had no role in study design, data collection and analysis,

## Abstract

The role for mechanical stimulation in the control of cell fate has been previously proposed, suggesting that there may be a role of mechanical conditioning in directing mesenchymal stromal cells (MSCs) towards specific lineage for tissue engineering applications. Although previous studies have reported that calcium signalling is involved in regulating many cellular processes in many cell types, its role in managing cellular responses to tensile loading (mechanotransduction) of MSCs has not been fully elucidated. In order to establish this, we disrupted calcium signalling by blocking stretch-activated calcium channel (SACC) in human MSCs (hMSCs) *in vitro*. Passaged-2 hMSCs were exposed to cyclic tensile loading (1 Hz + 8% for 6, 24, 48, and 72 hours) in the presence of the SACC blocker, gadolinium. Analyses include image observations of immunohistochemistry and immunofluorescence staining from extracellular matrix (ECM) production, and measuring related tenogenic and apoptosis gene marker expression. Uniaxial tensile loading increased the expression of tenogenic markers and ECM production. However, exposure to strain in the presence of 20 µM gadolinium reduced the induction of almost all tenogenic markers and ECM staining, suggesting that SACC acts as a mechanosensor in strain-induced hMSC tenogenic differentiation process. Although cell death was observed in prolonged stretching, it did not appear to be apoptosis mediated. In conclusion, the knowledge gained in this study by elucidating the role of calcium in MSC mechanotransduction processes, and that in prolonged stretching results in non-apoptosis mediated cell death may be potential useful for regenerative medicine applications.

## Introduction

The role for mechanical stimulation in the control of cell behaviour has been proposed to include cell proliferation, differentiation and even cell death. It is further suggested that

decision to publish, or preparation of the manuscript.

**Competing interests:** The authors have declared that no competing interests exist.

mechanical conditioning of mesenchymal stromal cells (MSCs) should be an area of interest as the manipulation of mechanical signalling cues, which enables MSC behaviour to be directed toward a specific cell lineage, can be potentially useful for tissue engineering applications. Mechanical loading is beneficial to the musculoskeletal system [1], particularly in tendons which it has been shown to produce superior repair outcomes when repaired tendons are subjected to stretching exercises [2–3]. When stretched, tendon cells, or commonly known as tenocytes, receives mechanical stimulation and translates them into biological cues which can be observed as phenotypic expressions [4]. This process is known as mechanotransduction. However, limited in their ability, existing tenocytes may not be sufficient to provide sufficient repair process and thus the need for cells to be recruited to the damaged or repaired site becomes paramount [5–6]. Local progenitor cells such as tendon progenitor cells, or sometimes known as tendon stem cells, provides the cell numbers required to make the repair process more effective [7]. Mechanotransduction also plays a role in this process, as it affects the transformation process of tendon stem cells into tenocytes, i.e. cell tenogenic differentiation. Recruited cells receive not only chemical cues to undergo cellular differentiation but also mechanical cues to direct cells towards tenogenic cell differentiation. It is based on this notion that researchers have embarked on the idea of using stem cells from external sources to provide the desired reparative effects.

In recent years, there has been an explosion in the number of research relating to the use of stem cells and other strategies to exploit this knowledge, i.e. with the aim to improve tendon reparative processes. One strategy, known as tissue engineering, has been introduced to manage tendon injuries, which includes the use of autologous or allogenic tenocytes, and/or autologous or allogenic adult stem cells with or without the use of delivery vehicles or biomaterials into damaged sites [8]. However, there have been several limitations being reported from using this technique, of which it has been shown that because of the loss of cell signalling such as calcium signalling, transplanted cells do not always survive the transplantation procedure, or if it does, it does not produce the desired sustainable effects needed in tendon repair [9–10]. It is thus become apparent that cell signalling is also an important aspect to be considered in pursuing the development of tendon tissue engineering.

In controlling cell signalling, several reports have suggested that calcium ( $\text{Ca}^{2+}$ ) as a signalling molecule is of importance, owing to the fact that there are many facets of cell behaviour that involves calcium dependent cell signalling communication and interactions [11–13]. Although previous studies have reported on the role of calcium signalling in many facets of cell physiology and in many cell types, the mechanisms related to the process of mechanotransduction and its relationship in controlling cell fate have not been extensively described. Whilst it may appear less likely that a minor change in the external mechanical cues can be perceived and transmitted at the cellular level, this phenomenon occurs quite frequently [14–16] and is said to involve many cellular pathways and function [17–18].

To explore the possibility of the role for calcium signalling in the management of cellular responses to tensile loading, we investigated the involvement of extracellular-intracellular calcium movement by disrupting the function of stretch-activated calcium channel (SACC) of human MSCs (hMSCs). We then observe the effects on MSC differentiation and death. It is worth noting that whilst calcium signalling may control many facets of cell behaviour, in this study we have limited our investigation to only cell differentiation and cell death; since it is our intention to establish the rate and strain levels that would provide the optimal cell response. This is in line with the study we conducted previously [19].

As mentioned earlier, MSCs sense mechanical force through different mechanisms but are influenced, or even influences calcium movements' intra- and extra-cellularly during this process [20]. Of several notable calcium unit regulations and mechanisms, stretch-activated ion

channels (SACs) has been mentioned as the most likely component to be involved extensively when receiving mechanical stimuli [21]. Mechanical stimulation of cells may create calcium signals by causing the entry of the calcium ion across the plasma membrane or it can be released from intracellular stores [14]. We postulate that changes in cyclic mechanical loading activate stretch-sensitive channels in MSCs and modulate tenogenic differentiation in physiological conditions. We also postulate that in prolonged cyclical conditions it is possible that cell death will occur, but may not be via apoptosis. To study this, we examine the differentiation potential of human bone marrow stromal cells when subjected to uniaxial stretching treated with or without gadolinium and looked at the possibility as to whether apoptosis pathways may be involved from the genes expressed.

## Materials and methods

### Harvesting bone marrow specimens from human

The use of bone marrow stromal cells in this study was based on the approval from the Medical Ethics Committee in University Malaya Medical Centre (reference number: 369.19). Bone marrow specimens were collected using a large aspirator by orthopaedic surgeons from our institution. We obtained written informed consents from ten patients undergoing arthroplasty type procedures (N = 10; mean age = 65 years).

### Isolation and expansion of hMSCs

Human bone marrow MSCs isolation was performed using our standard laboratory protocol, also previously described in other publications [19, 22]. Briefly, diluted bone marrow specimens were slowly layered on top of Ficoll–Paque PREMIUM (density of 1.077 g/mL) (Amersham Biosciences, Uppsala, Sweden). The mononuclear cells were then extracted after undergoing gradient density centrifugation at 2,200 rpm for 25 min. The cell pellet was extracted after a centrifugation at 1,600 rpm for 10 min. The pellet was then resuspended in fetal bovine serum (FBS) (Invitrogen–Gibco, USA). The mixture was then transplanted in culture flask to be cultured in cell culture medium (low-glucose DMEM supplemented with 10% FBS, 1% penicillin-streptomycin and 1% Glutamax-1) (Invitrogen–Gibco, USA). Cell cultures were maintained at 37°C (humidified atmosphere) supplemented with 5% CO<sub>2</sub>. Growth medium was replaced every 72 hrs to achieve optimal cell proliferation. This continued until the cell cultures became 80–85% confluent. The cells were serially passaged and expanded until passage-2 before being used for our experiments. The hMSCs surface markers analysis and tri-lineage differentiation was performed following standards established as our standard laboratory protocol, which was also mentioned in our previous publications [19].

### Optimization of gadolinium concentration

A stock solution 10 mM of gadolinium (Sigma, USA) was prepared in distilled water. To optimize the concentration of gadolinium to be used in this study, the blocker at various concentrations (2 μM, 10 μM, 20 μM, 50 μM, 80 μM and 100 μM) was diluted with culture medium immediately before treatment was started on hMSCs. The optimum concentration was chosen and continued for the following experiments.

### Cells seeding and the application of mechanical stretching on cultured cells

A total of  $1 \times 10^5$  passaged-2 hMSCs per well were seeded onto 10 cm<sup>2</sup> collagen type I-coated (Sigma, USA) silicone chamber (STREX, Japan). In order to synchronize cells at G<sub>0</sub> phase of

the cell cycle, the concentration of FBS was reduced to 1% after 48 h of the initial culture period. Following synchronization for 24 h, the samples were changed to normal cell culture medium before assembled into uniaxial strain device. The device was programmed to approximate sinusoidal waveforms to 8% strain amplitude at a frequency of 1Hz. This variable was based on our previous findings where we demonstrated that in this setting, cell differentiation was optimal and resulted in enhanced collagen synthesis or tenogenesis gene expression [19]. Cells in the control group were also cultured on silicone chamber and maintained in the same incubator, but did not undergo mechanical stimulation. The cells were harvested after 6, 24, 48, and 72 h of cyclic loading for further investigation; including the microscopy of cells, immunostaining, and gene expression using multiplex assay method.

### Collagen immunohistochemistry

Cells from the experimental groups and corresponding control group were fixed on the STREX chamber stretchable substrate in methanol for 15 min at room temperature. Hydrogen peroxidase was then used to block endogenous peroxidase activity and reduce non-specific background. Primary antibodies i.e. rabbit anti-collagen type I or rat anti-collagen type III (Merck, Germany) diluted at 1:100 was applied to each specimen and incubated for 1 h. This was followed by the incubation with streptavidin-peroxidase secondary antibody (Dako, Denmark) for 30 min. Finally, the samples were developed with 3,3'-diaminobenzidine tetrahydrochloride chromogen substrate for 30 min and examined under light microscopy (Nikon Eclipse TE2000-S; Nikon Corporation, Tokyo, Japan). All staining procedures were performed in a humidified chamber at room temperature.

### N-cadherin and fibronectin immunofluorescence

The cells were fixed with 3.7% paraformaldehyde followed by a permeabilization process using cold acetone. The cells were then blocked with 1% bovine serum albumin for 30 min, and incubated with N-cadherin or fibronectin antibody (Abcam, Cambridge, UK) at 1:300 dilutions in phosphate buffered saline (PBS) for 1 h at room temperature. The cells were then washed in PBS, incubated with fluorescein isothiocyanate (FITC) secondary antibodies (Abcam, Cambridge, UK) at a concentration of 1:600 dilution for 1 h in the dark, and counter-stained for nuclei with Hoechst (Molecular Probes, Oregon, USA) for 10 min. Stained cells were analysed under a laser scanning confocal microscope (Leica TCL SL, Germany).

### RNA extraction and multiplex gene expression assay

To determine the correlation between the tenogenic differentiation potential of hMSCs as the result of mechanical stimulation and  $\text{Ca}^{2+}$  blocking activity, we used multiplex gene expression assay. The cells were lysed using lysis buffer (Qiagen, Canada) with 1%  $\beta$  mercaptoethanol. Total ribonucleic acid (RNA) was extracted per the manufacturers' instructions using the RNeasy mini kit (Qiagen, Canada) and stored at  $-80^{\circ}\text{C}$  until further processing. Quantity and quality of RNA were analyzed using a spectrophotometer (Nano-Photometer, Implen, München, Germany), and a BioAnalyzer (Model 2100, Agilent Technologies, USA). Only samples with high quality were selected for microsphere-based multiplex branched DNA downstream analysis. The quantitation of mRNA expression was carried out according to the manufacturer's instructions using the QuantiGene 2.0 Plex assay (2.0 plex set 12082, Panomics/Affymetrix Inc., Fremont, CA, USA). Individual bead-based oligonucleotide probe sets specific for each gene (Table 1) examined were developed by a selected licensed manufacturer (Panomics/Affymetrix Inc., Fremont, CA, USA). In determining the optimal housekeeping gene, we compared *PGK1* (phosphoglycerate kinase 1), *HPRT1* (hypoxanthine phosphoribosyltransferase 1), and

**Table 1. The tenogenic differentiation genes of interest were determined in this study.**

| Related marker    | Gene name                     | Abbreviation |
|-------------------|-------------------------------|--------------|
| ECM component     | Collagen type I, $\alpha 1$   | <i>COL1</i>  |
|                   | Collagen type III, $\alpha 1$ | <i>COL3</i>  |
|                   | Decorin                       | <i>DCN</i>   |
| Tendon lineage    | Tenascin C                    | <i>TNC</i>   |
|                   | Scleraxis homolog A           | <i>SCX</i>   |
|                   | Tenomodulin                   | <i>TNMD</i>  |
| Housekeeping gene | Phosphoglycerate kinase 1     | <i>PGK1</i>  |

<https://doi.org/10.1371/journal.pone.0178117.t001>

*TBP* (TATA box binding protein), and observed that *PGK1* was the most stable housekeeping gene in our experiments [19].

In order to determine whether the inhibition of  $Ca^{2+}$  by gadolinium may affect apoptosis of the cells during differentiation during mechanical stretching, a similar method as that mentioned previously was carried out by using the QuantiGene 2.0 Plex assay (2.0 plex set 12314, Panomics/Affymetrix Inc., Fremont, CA, USA) (Table 2). Values for mRNA transcript levels were normalized to corresponding *GAPDH* (Glyceraldehyde 3-phosphate dehydrogenase) values, as was compared to *TBP* and *ACTB* (actin beta).

### Statistical analysis

Data were presented as mean  $\pm$  standard deviation or mean error. For nuclei count experiment, Student's t-test (two-sided, unpaired) was carried out to compare the differences in mean values. While the other experiments, statistical significance was analysed by one-way analysis of variance (ANOVA). A *p* value of  $< 0.05$  was considered statistically significant for all statistical tests.

## Results

### Identification of hMSCs

The shape of the cells from P0 to P3 was shown morphologic characteristics of human bone marrow stromal cells, including fibroblastic-like, spindle-shaped, and plastic adherent (data not shown). The flow cytometry analysis showed that hMSCs exhibited positive staining for CD29 (96.5%), CD44 (97.1%), CD73 (96.6%), CD90 (99.2%), and CD105 (97.7%), while negative staining for CD14 (2.8%), CD34 (0.2%), CD45 (1.3%) and HLA-DR (2.7%) confirmed the phenotype of hMSCs. The cells showed the ability for tri-lineage differentiation (data not shown). Our results demonstrated that hMSCs could successfully commit towards osteoblast lineage visualized by Alizarin Red S staining (for calcified matrix); adipocyte lineage observed by Oil Red O (for lipid droplets); and chondrogenic lineage in the pellet culture system demonstrated positively by Safranin O staining (for cartilaginous matrix). Hence, based on the results of cell identification analyses, it became assured that the isolated stem cells were MSCs.

### Appropriate gadolinium concentration as SACC inhibitor

Unstrained hMSCs were treated with different concentration of gadolinium (2, 10, 20, 50, 80 and 100  $\mu$ M) to identify the optimal concentration of gadolinium without inducing morphological changes or cell detachment in the silicon chamber (Fig 1). Cells treated at the concentration of 2  $\mu$ M and 20  $\mu$ M showed normal appearance of MSCs with similar cell numbers to that of cells in untreated wells. Cells treated with a concentration above 20  $\mu$ M demonstrated

**Table 2. The apoptosis genes of interest were determined in this study.**

| Related marker                     | Gene name                                                                   | Abbreviation                             |              |
|------------------------------------|-----------------------------------------------------------------------------|------------------------------------------|--------------|
| Extrinsic pathway                  | Caspase 3, apoptosis-related cysteine protease                              | <i>CASP3</i>                             |              |
|                                    | Caspase 9, apoptosis-related cysteine protease                              | <i>CASP9</i>                             |              |
|                                    | Fas (TNF receptor superfamily, member 6)                                    | <i>FAS</i>                               |              |
|                                    | Tumor necrosis factor (ligand) superfamily, member 6                        | <i>FASLG</i>                             |              |
| Intrinsic pathway (pre-apoptotic)  | BCL2-associated X protein                                                   | <i>BAX</i>                               |              |
| Intrinsic pathway (anti-apoptotic) | B-cell CLL/lymphoma 2                                                       | <i>BCL2</i>                              |              |
| Others                             | Calpain 1, (mu/l) large subunit                                             | <i>CAPN1</i>                             |              |
|                                    | Calpain 6                                                                   | <i>CAPN6</i>                             |              |
|                                    | Inositol 1,4,5-triphosphate receptor, type 1                                | <i>ITPR1</i>                             |              |
|                                    | Catalase                                                                    | <i>CAT</i>                               |              |
|                                    | Cytochrome b-245, beta polypeptide (chronic granulomatous disease)          | <i>CYBB</i>                              |              |
|                                    | NADPH oxidase 4                                                             | <i>NOX4</i>                              |              |
|                                    | Cytochrome c-1                                                              | <i>CYC1</i>                              |              |
|                                    | Nuclear factor of kappa light polypeptide gene enhancer in B-cells 1 (p105) | <i>NFKB1</i>                             |              |
|                                    | Apoptosis-inducing factor, mitochondrion-associated, 1                      | <i>AIFM1</i>                             |              |
|                                    | Poly (ADP-ribose) polymerase family, member 1                               | <i>PARP1</i>                             |              |
|                                    | Poly (ADP-ribose) polymerase family, member 2                               | <i>PARP2</i>                             |              |
|                                    | Poly (ADP-ribose) polymerase family, member 4                               | <i>PARP4</i>                             |              |
|                                    | Mitogen-activated protein kinase 1                                          | <i>MAPK1</i>                             |              |
|                                    | Superoxide dismutase 1, soluble (amyotrophic lateral sclerosis 1 (adult)    | <i>SOD1</i>                              |              |
|                                    | Nuclear factor of activated T-cells, cytoplasmic, calcineurin-dependent 1   | <i>NFATC1</i>                            |              |
|                                    | Chromosome 6 open reading frame 4                                           | <i>TRAF3IP2</i>                          |              |
|                                    | TNF receptor-associated factor 6                                            | <i>TRAF6</i>                             |              |
|                                    | Glutathione peroxidase 1                                                    | <i>GPX1</i>                              |              |
|                                    | Protein tyrosine kinase 2                                                   | <i>PTK2</i>                              |              |
|                                    | Calcium/calmodulin-dependent serine protein kinase (MAGUK family)           | <i>CASK</i>                              |              |
|                                    | Housekeeping gene                                                           | Glyceraldehyde 3-phosphate dehydrogenase | <i>GAPDH</i> |

<https://doi.org/10.1371/journal.pone.0178117.t002>

changes from their fibroblastic morphology and reduced cell number, obviously at higher concentration of 80  $\mu$ M and 100  $\mu$ M, where cell death and cell detachment became apparent. Similar for the result of live/dead cells experiment, the number of dead cells (red colour) appeared to increase by increasing the SACC blocker concentration (Fig 2). Based on these results, 20  $\mu$ M concentration of gadolinium was then used for the following experiments.

### Cell morphology following SACC inhibition and mechanical stimulation

The morphology of SACC inhibited hMSCs showed no significant difference with non-SACC inhibited hMSCs at the same time points (Fig 3). However, the strained cells treated with SACC blocker showed some changes in the cell numbers.

### Changes in ECM production during stretching and blocking of SACC

Fig 4 shows the immunostaining of collagen I, collagen III, fibronectin and N-cadherin on both unstrained and strained cells treated with or without gadolinium. The expression of collagen III was found to be decreased in both unstrained and strained cells treated with gadolinium compared to cells without gadolinium treatment. Without SACC blocker, the expression of fibronectin and N-cadherin was increased in strained cells as compared to unstrained cells. However, the intensity of FITC positive cells were relatively less between the strained and

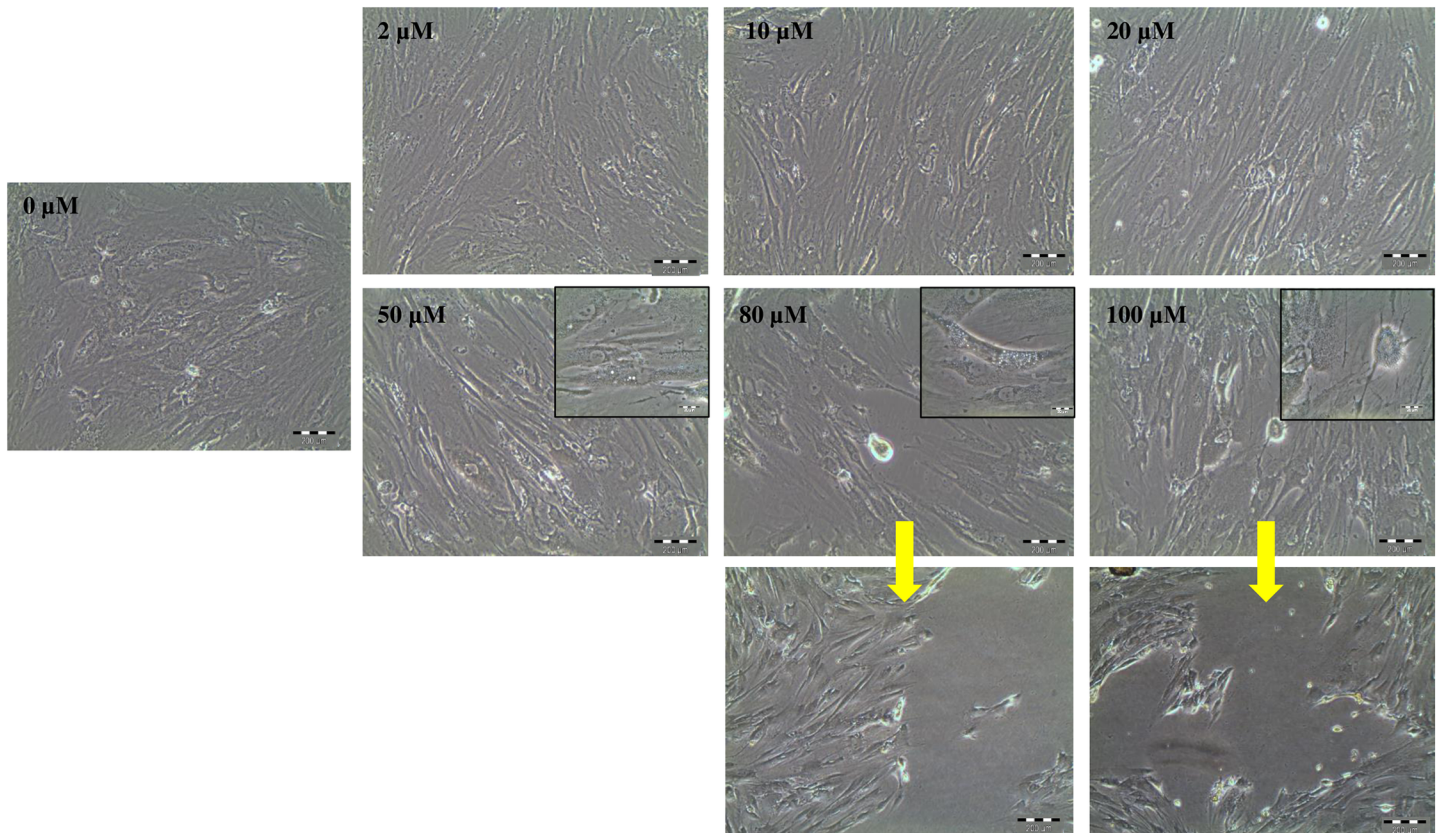

**Fig 1. Effects of different gadolinium concentration on hMSCs.** Morphological changes of hMSCs cell culture after 72 hours incubation of gadolinium. By increasing the gadolinium concentration, small vesicles were observed (probably apoptotic bodies) as well as cell detachment (the yellow arrow).

<https://doi.org/10.1371/journal.pone.0178117.g001>

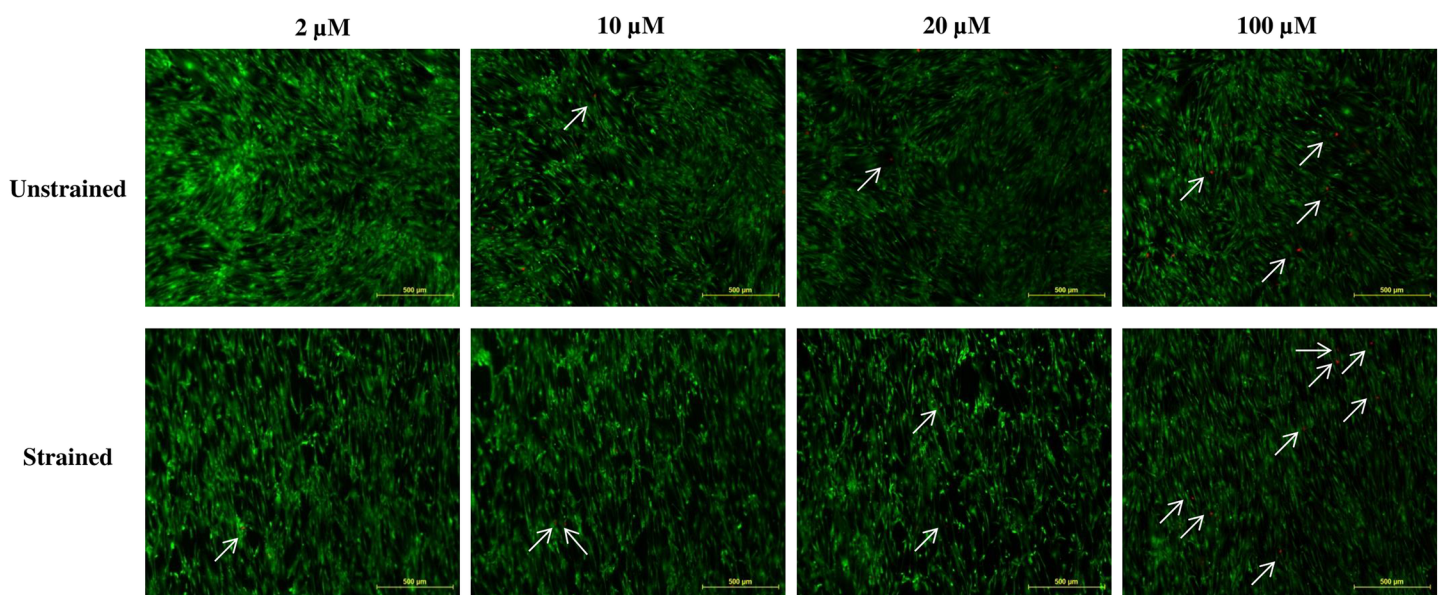

**Fig 2. Live (green) and dead (red) cells on hMSC treated with different concentration of gadolinium.** White small arrows indicate dead cells. The number of dead cells increased by increasing the SACC blocker concentration.

<https://doi.org/10.1371/journal.pone.0178117.g002>

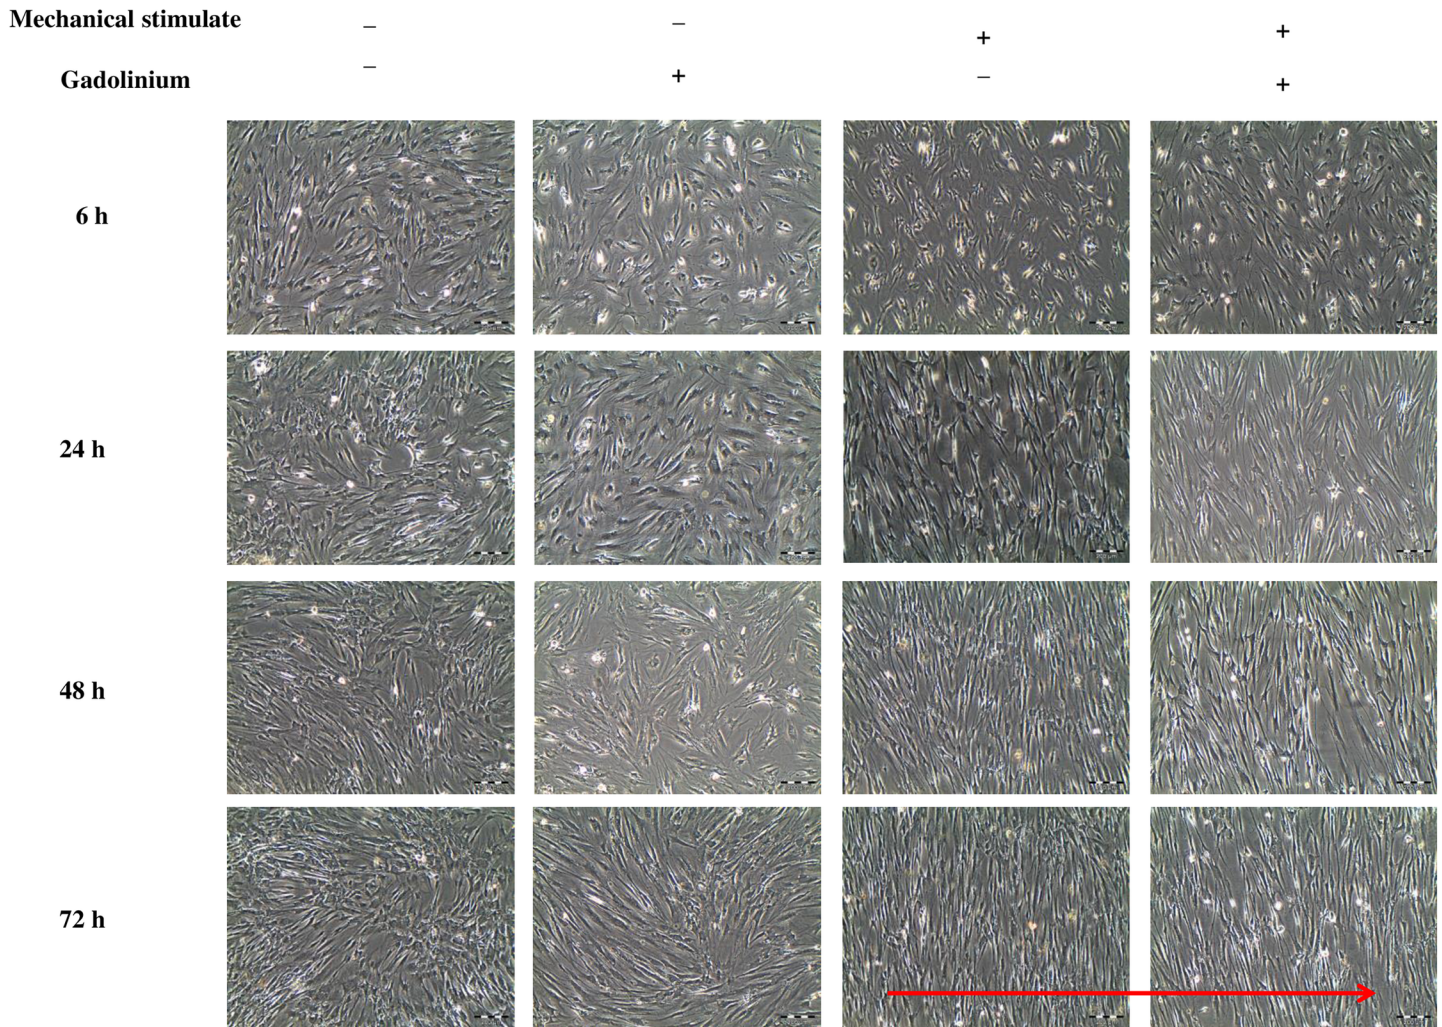

**Fig 3. Morphology of hMSCs after treated with gadolinium.** The unstrained cells and strained cells at 1 Hz, 8%, at different duration of stretching exposure, with or without using 20  $\mu$ M gadolinium, respectively. The direction of uniaxial strain is indicated as red arrow.

<https://doi.org/10.1371/journal.pone.0178117.g003>

unstrained groups when compared to the gadolinium treated cells. Within the group of strained cells, using gadolinium resulted in the reduction in the production of ECM fibronectin and N-cadherin. These results suggest that the ECM production correlates with the presence of SACC in hMSCs. It also suggests that the inhibition of SACC may have resulted in inadequate cell-matrix interaction due the disruption of ECM formation.

### Influence of SACC inhibition on tenogenic differentiation

Our previous study demonstrated that mechanical stimulation can trigger the tenogenic differentiation of hMSCs [19] (Fig 5A). We then evaluated as to whether inhibiting SACC can influence the ability of mechanical stimulation induced differentiation of hMSCs. Although the cells were mechanically stimulated, blocking SACC has resulted in the decreased expression of tenogenic markers (Fig 5B). *DCN* and *COL3* were down-regulated after 6 h, most significantly for *COL3*. Interestingly, inhibiting SACC does not result in the down-regulation of *COL1*, although the expression levels appeared lower over time. *DCN* and *TNC* were slightly increased at 6 h, as compared to strained cells without SACC blocker. This increase nevertheless declined



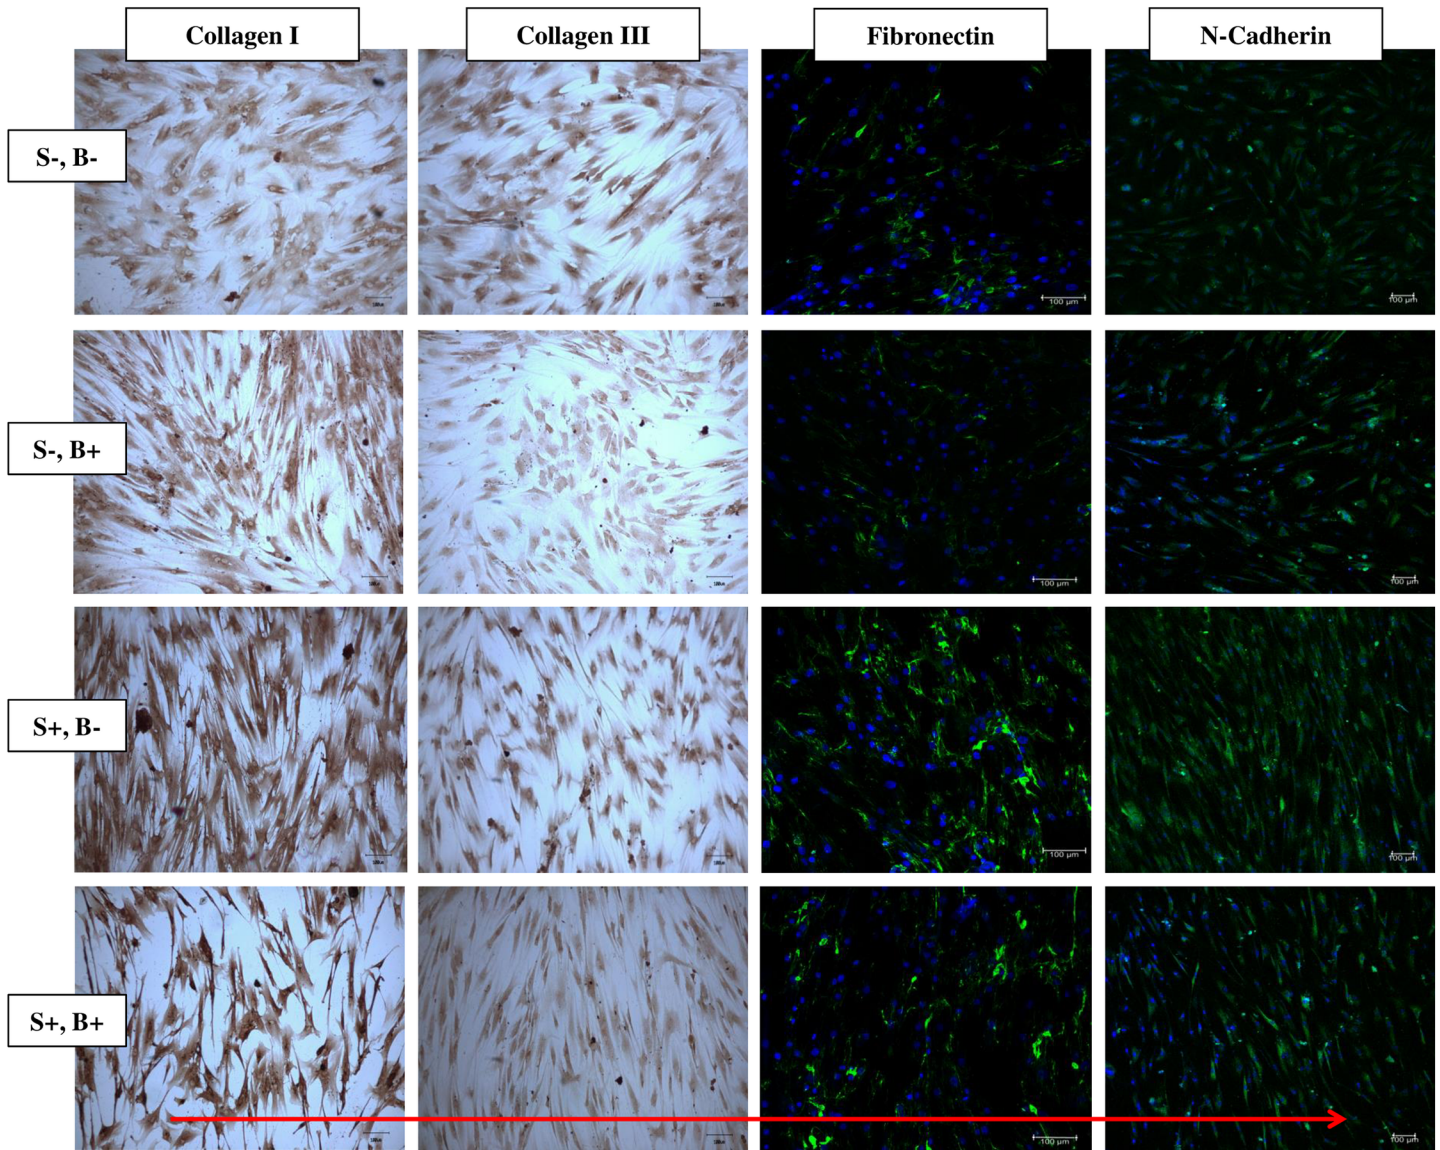

**Fig 4. Immunostaining and immunofluorescence images of unstained and strained hMSCs cultured with or without gadolinium.** The cells were stained with immunostaining antibody collagen I and collagen III. Immunofluorescence antibody was used as a method to access fibronectin and N-cadherin. Cells were stained with Hoechst (blue) to reveal the nucleus, and the images were merged with the corresponding fibronectin or N-cadherin (green). The direction of uniaxial strain is indicated as red arrow. S-: no mechanical stimulation; S+: cyclic stretching applied; B-: no gadolinium; B+: with SACC inhibitor, gadolinium.

<https://doi.org/10.1371/journal.pone.0178117.g004>

gradually at later time points. The other two specific tenogenic genes markers, *SCX* and *TNMD*, down-regulated significantly after 24 h. This suggests that SACC might play important role in the differentiation pathway, especially tenogenic lineage.

### SACC inhibition did not induce hMSCs apoptosis

When cells were stained with Hoechst, it showed significant reduction (approximately 16%) of cell number in the strained cells that is treated with SACC blocker (Fig 6). Based on the results of Hoechst staining, we anticipated whether the cell death could be due to apoptosis here, we

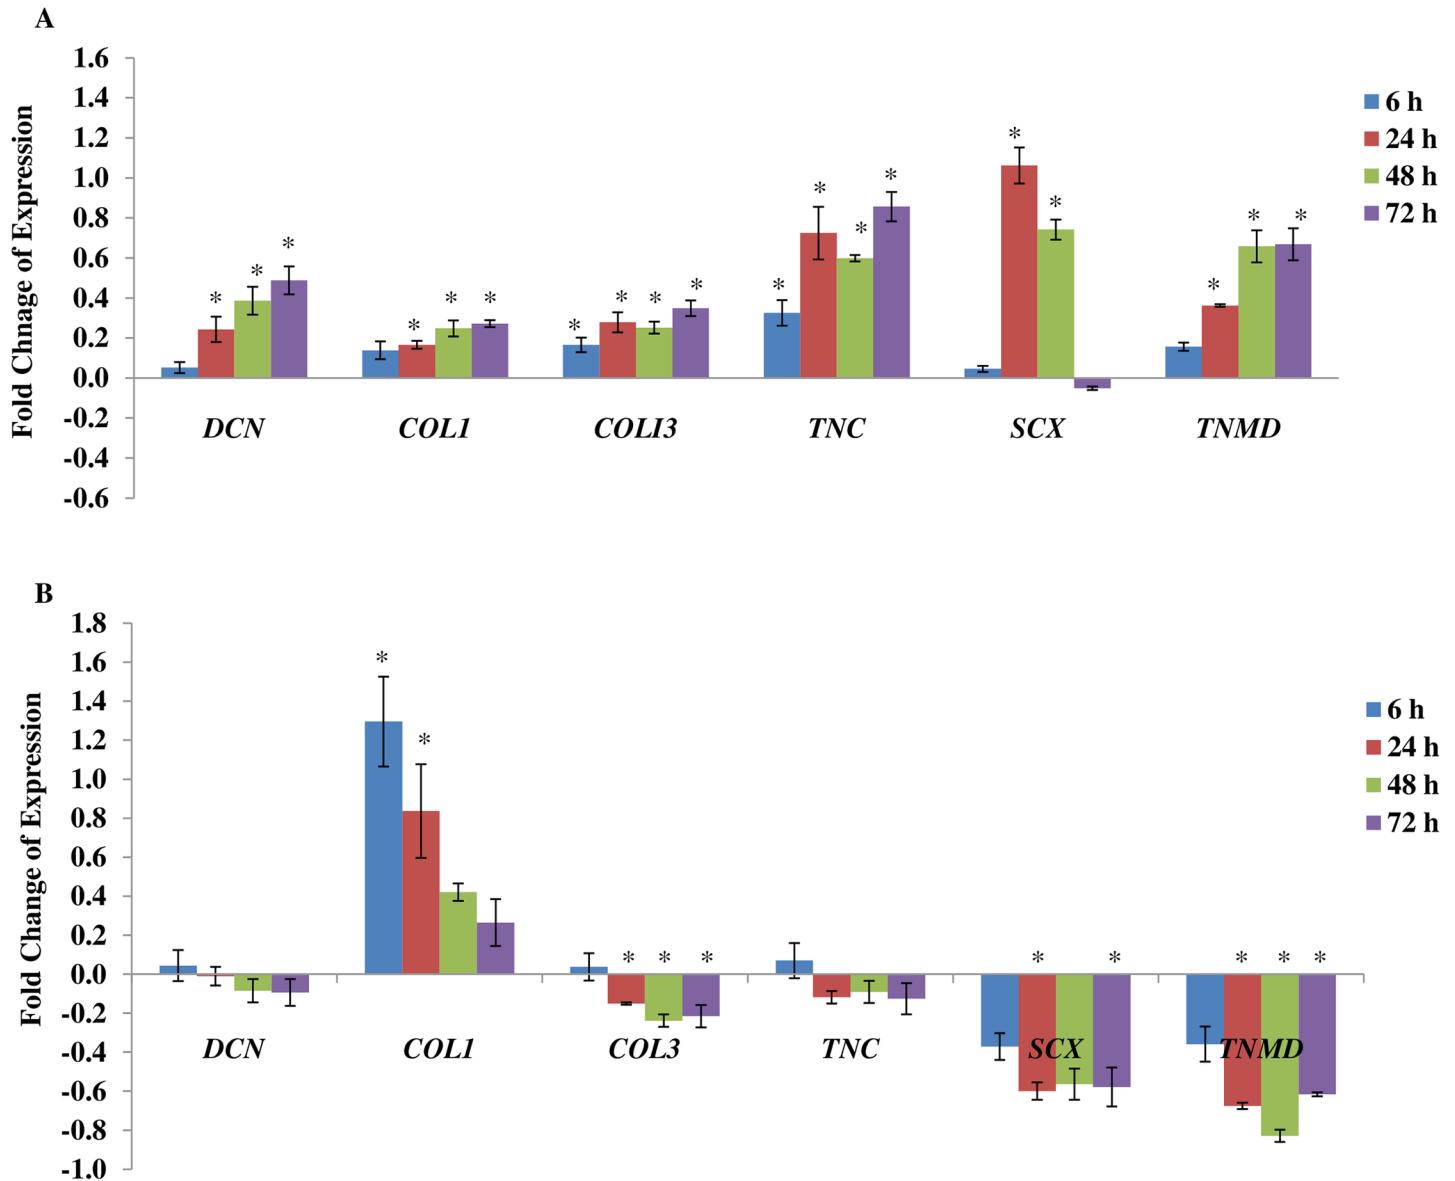

**Fig 5. Effect of uniaxial stretching on mRNA expression of tenogenic markers in hMSCs, which were performed at 1 Hz + 8% in different duration of mechanical stimulate.** (A) Tenogenic differentiation of hMSCs is triggered by mechanical stimulation. Fold changes of expression were measured by normalizing the relative expressions with the corresponding control groups (unstrained groups). Statistical significance ( $p < 0.05$ ) was represented by asterisk which compared to unstrained. (B) Tenogenic lineage genes expression was influenced after adding SACC blocker,  $Gd^{3+}$  to the strained cells. The value of fold change was presented as ratio of strained group treated with gadolinium to strained group without gadolinium. Statistical significance ( $p < 0.05$ ) was represented by asterisk which was compared to strained group without treatment (indicated as 0).  $N = 6$ ,  $n = 3$ . Error bar =  $\pm 1$  SD.

<https://doi.org/10.1371/journal.pone.0178117.g005>

studied the possibility of the SACC inhibited cells subjected to stretching was driven to apoptotic. Fig 7 shows that by blocking SACC is not inducing apoptosis of hMSCs.

### Discussion

The present study used an *in vitro* mechanical stimulation model system in which isolated hMSCs are cultured on type-I collagen coated silicone membrane to determine if tenogenic differentiation are influenced by SACC activity, which indirectly indicates that calcium

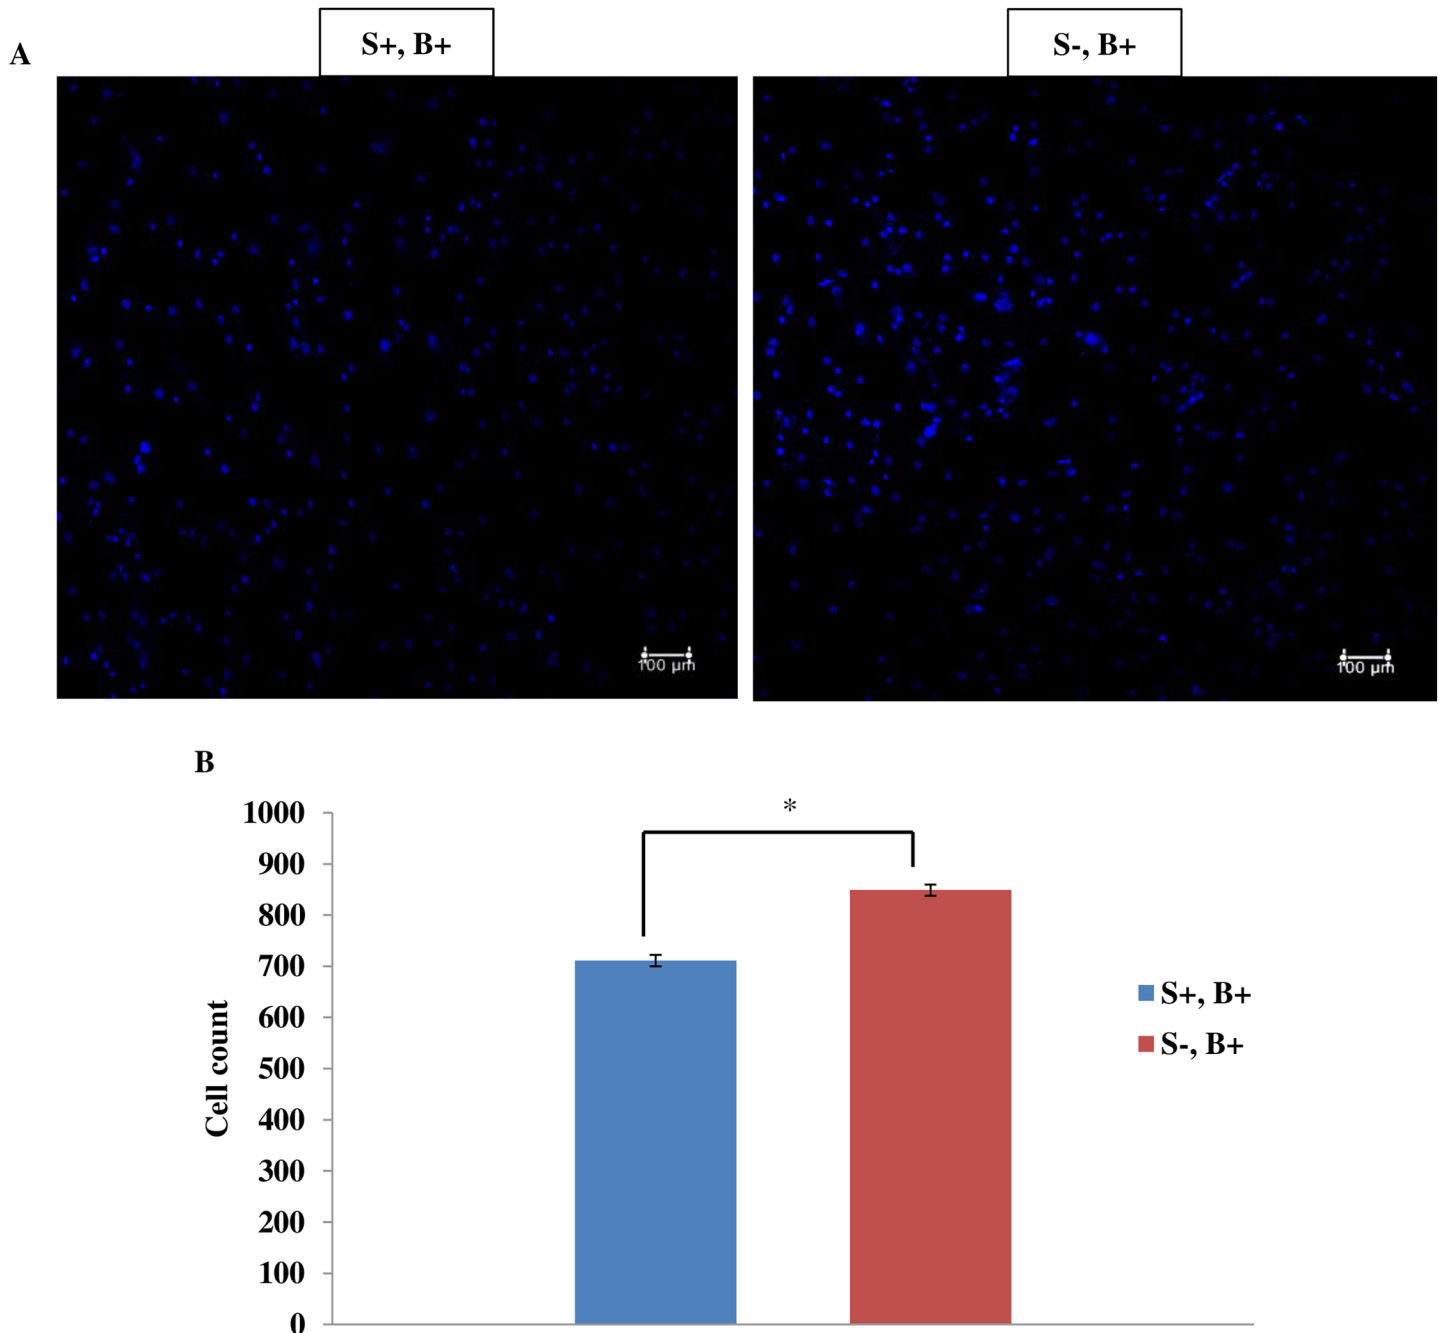

**Fig 6. Effect of gadolinium on strain-induced decrease in DNA counts.** The cells were fixed and DNA stained by Hoechst (blue). (A) The nuclei of the cells were visualized using confocal microscope and counted. (B) In the presence of  $Gd^{3+}$ , 8% + 1 Hz for 72 h significantly decreased DNA count. The result was expressed as a mean  $\pm$  1 SD for five randomly selected fields in 3 independent experiments. Statistical significance ( $p < 0.05$ ) was represented by asterisk which was compared to unstrained group with gadolinium treated. S-: no mechanical stimulation; S+: cyclic stretching applied; B+: with SACC inhibitor, gadolinium.

<https://doi.org/10.1371/journal.pone.0178117.g006>

signalling may be involved. Some studies have employed this model to investigate hMSCs mechanotransduction in influencing cell deformation in certain controlled microenvironment changes, such as pH and osmotic changes [23–25]. Our study demonstrates that cyclic tensile loading on hMSCs produces an up-regulation of collagen synthesis. In addition, this also

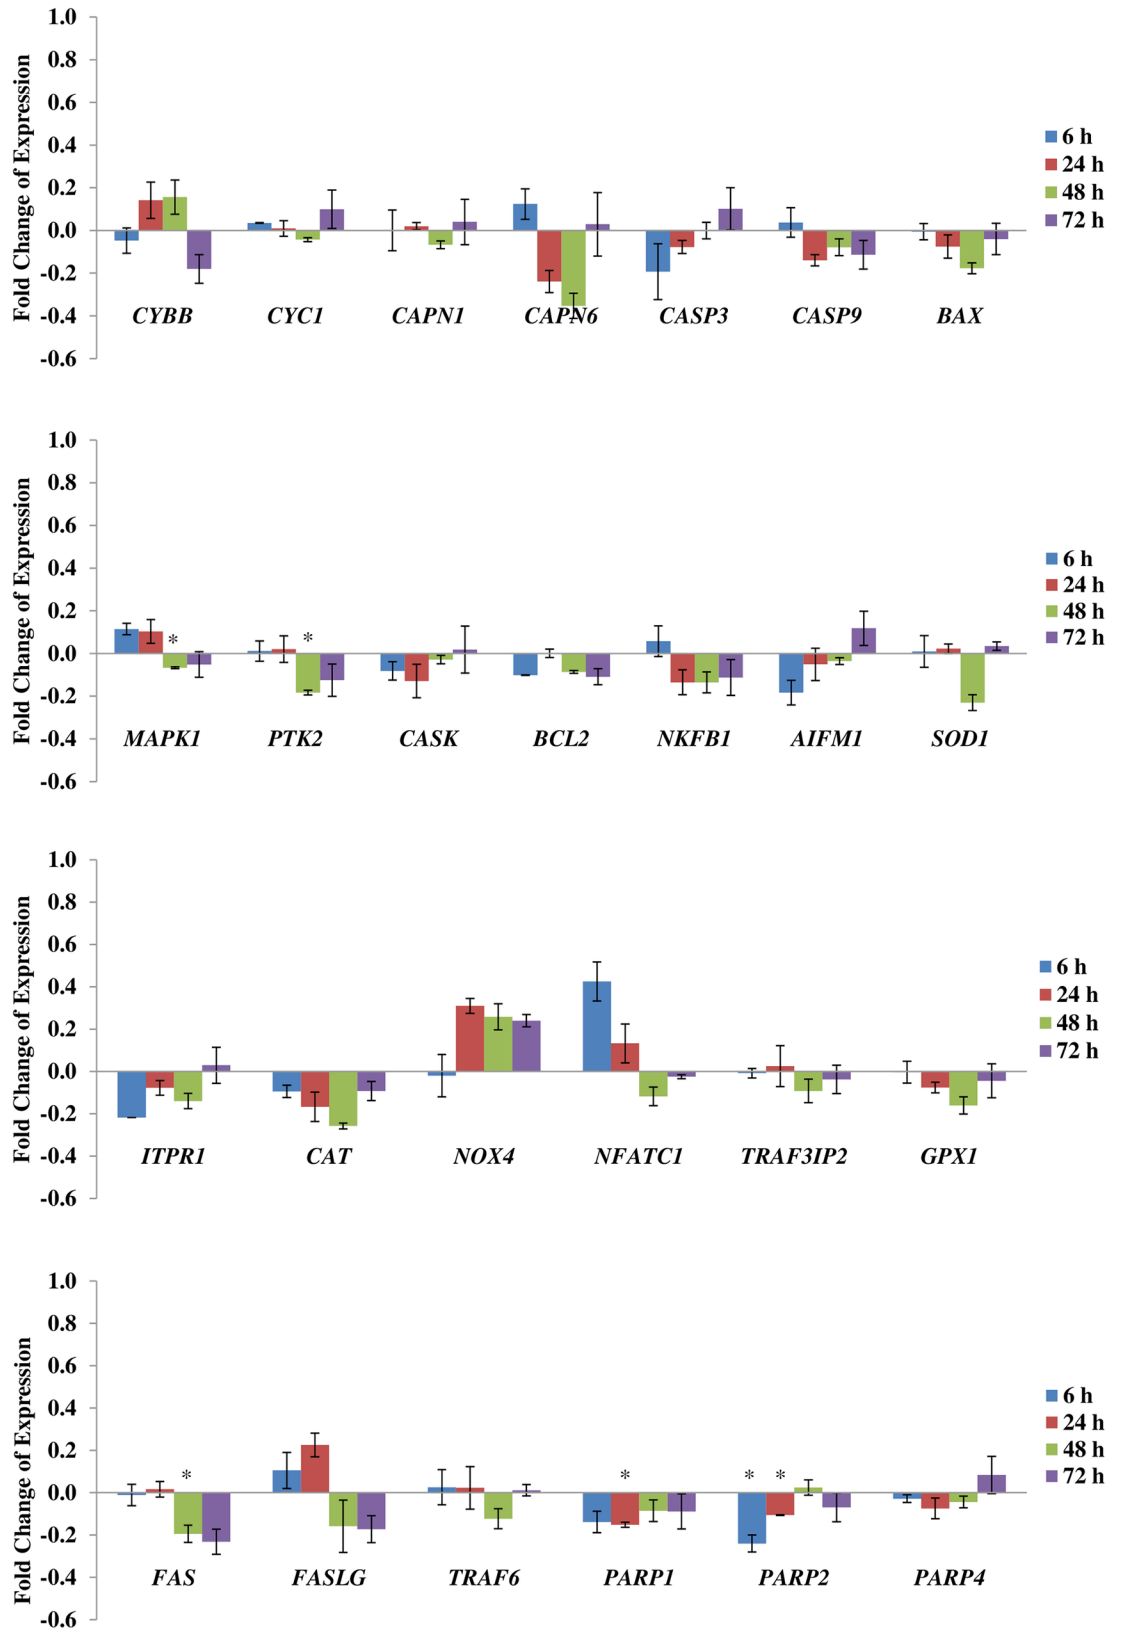

**Fig 7. mRNA expression of apoptosis genes subjected to cyclic tensile loading at 1 Hz and 8% at different duration of stretching.** The expression level of each gene was normalized with the level of housekeeping gene. The

value of fold change was presented as ratio of strained group to unstrained group, where both groups treated with gadolinium. Statistical significance ( $p < 0.05$ ) was represented by asterisk which compared to unstrained group (indicated as 0).  $N = 6$ ,  $n = 3$ . Error bar =  $\pm 1$  SEM.

<https://doi.org/10.1371/journal.pone.0178117.g007>

results in the transformation of stromal cells into tenogenic-like cells, which is dependent on both the applied frequency and amount of strain subjected to these cells [19]. However, despite these observations, the essential fundamental understanding underpinning the regulation of the mechanotransduction pathways remain unclear. In our attempt to prove our hypothesis that stretch-activated channel may be involved in this process, we investigated the effect of the cyclic uniaxial mechanical stimulation on SACC by using gadolinium ion to block the channel, i.e. because gadolinium is a commonly used antagonist of SACC [26]. The calcium influx by the mechanical potential appeared to be sensitive to the presence of the gadolinium ion. As predicted,  $Gd^{3+}$  being a SACC blocker, reduces the differentiation responses of hMSCs. Our study shows for the first time that  $Gd^{3+}$  counteracts the tenogenic differentiation effect of hMSCs as the result of uniaxial cyclic mechanical stretching. Nevertheless, it was interesting to note that cell morphology and expression of genes related to apoptosis was not altered significantly. The results of our study confirms that applied uniaxial cyclic load (1 Hz + 8%) with channel blocker does not induce cell death but instead delayed the differentiation process which indirectly indicates that SACC plays a role in the differentiation process of hMSC into tenogenic like cells.

Mechanotransduction, the transmission and conversion of a mechanical stimulus into a biological response, through a variety of mechanisms of which in the present study suggests that it is channel dependent. There are three main stages of mechanotransduction: mechanocoupling, cell-to-cell communication, and effector cell response. Mechanocoupling is the process by which the applied load is transmitted through the tissues and cells, resulting in different types of cellular deformation. Stretch-activated calcium channels have been shown to be involved quite extensively in the mechanotransduction process, demonstrating varied responses as different types of mechanical loading are exerted to cells and tissues. This has been reported in many mesenchymal derived cells such as chondrocytes and MSCs [27–29]. Despite cells of similar lineage i.e. mesenchymal in origin, different cells depend on different types of calcium channel, mainly because of the different functions of these cells. For example, unlike osteoblasts,  $Ca^{2+}$  secretion by MSCs does not occur via L-type  $Ca^{2+}$  channels but rather, it is mediated by inositol 1,4,5-trisphosphate receptors (InsP<sub>3</sub>Rs). Further, its entry is controlled by store-operated  $Ca^{2+}$  channels and not through the efflux of calcium [30]. In general, ion movement in and out of cells response to applied mechanical loading in an almost similar manner despite the differences in their destined functions. It is usually the case that with mechanical stimulation such as stretching, SACs open to allow ions like  $Ca^{2+}$ ,  $Na^+$ ,  $K^+$ , and  $Mg^{2+}$  to pass through, transducing mechanical signals towards the activation of intracellular signalling molecules [13, 31–32]. Furthermore, integrins, the cytoskeleton, and  $Ca^{2+}$  channels have previously been proposed to interact with one another [13, 33]. It is shown that integrin binding and cytoskeletal organization regulate the mechanotransduction process of stretching, which suggests a possible role for  $Ca^{2+}$  signalling in this process. However, whilst these signals may regulate the process of cell proliferation and differentiation through specific pathways such as focal-adhesion kinases (FAK) or mitogen-activation phosphorylation kinases (MAPK) pathways, in aberrant or extreme mechanical loading conditions, the increase in intracellular  $Ca^{2+}$  can trigger the activation of the calpain family of regulatory proteases that help to drive signalling transduction pathways forward to initiate a downstream pro-apoptotic signalling process [34].

Changes in cell morphology are an important feature to be observed, since the deformation of cell shape is implicated in the translation of mechanical forces into a biochemical response. This may result in the opening of ion channels such as SACC, and the activation of transmembrane signalling proteins such as integrins and G-protein coupled receptors [13]. The mechanically stimulated cell may also spread the signal to adjacent cells (cell-to-cell communication, involving the passage of calcium ions via gap junction, for instance) thereby amplifying the response [35]. In response to elevated intracellular calcium and other signals, enzyme activity is initiated within the cell (e.g. activation of MAPK family members) leads to gene transcription and the production of protein which can include newly synthesized extracellular matrix, or autocrine/paracrine substances like TGF $\beta$  or IGF-I which further amplify the adaptive responses [36]. This then suggests that ionic changes, in this case calcium being a widely accepted second messenger, may be heavily involved in the process. It is interesting to note however that Liu et al [37] reported that greater extracellular Ca<sup>2+</sup> concentrations did not change cell proliferation but significantly inhibited MSCs differentiation.

A study of Coirault et al. [38] demonstrated that effects of Gd<sup>3+</sup> were not due to inhibition of voltage-gated Ca<sup>2+</sup> channels. A selective stretch-activated channel blocker would allow the relative contribution of stretch- and voltage-activated channels to tension development to be quantified more precisely. At present, there have been no such blocker available that has a similar function to gadolinium, and as such, gadolinium is presently the only prescribed blocker of stretch-activated channels [39–41]. In previous studies, cation channels are blocked using Gd<sup>3+</sup>, in concentrations of 10–100  $\mu$ M, depends on cell types [38, 42–45]. Incubation of cells with high concentrations of Gd<sup>3+</sup> blocks electrical stimulation-induced concentration of intracellular calcium increases, as well as inhibiting the influx and efflux of calcium [40]. The study further reveals that electrical stimulation-induced mechanical deformation of cells may also be prevented by blocking SACCs and other Gd<sup>3+</sup>-sensitive pathways. In terms of proliferation and differentiation, a previous study noted that the inhibition of ERK1/2 phosphorylation by mechanical stretching was dependent on the Gd<sup>3+</sup> concentrations [46]. A moderate dose of Gd<sup>3+</sup> (20  $\mu$ M) was chosen in our study to treat hMSCs to avoid non-specific (or toxic) effects where possible. It is important to recognize that gadolinium ions have a high affinity to bind free bicarbonate and phosphate ions present in several physiological solutions [47]. However, in culture medium (including DMEM used in this study), the phosphate and bicarbonate ions exist as protonated anions that have very low affinity for gadolinium ions. Nevertheless, the possibility that some gadolinium ions are neutralized in the culture medium due to their binding to phosphate and bicarbonate anions cannot be ruled out [41]. Based on our previous literature, the SACC inhibition was assumed to be occurred with 20  $\mu$ M of gadolinium. A study of Pingguan-Murphy et al [44] showed that isolated articular chondrocytes in unstimulated agarose constructs exhibited spontaneous characteristic of Ca<sup>2+</sup> transients, where they explained that this may be associated with several factors including the presence of growth factors in the serum, endogenous release of low levels of ATP, and the generation of oxygen-free radicals caused by laser illumination.

In terms of changes to cell morphology as the result of cyclic loading, the present study corroborates previous findings that cell orientation is altered when subjected to cyclic loading [48–49]. Cell appears to re-orientate in longitudinal axis perpendicular to its original orientation as well as the direction of cyclic loading. This phenomenon appears to be necessary for the reduction of excessive strain applied to the cells. It has been suggested that the mechanisms involved in promoting cellular realignment is dependent on various factors, which includes the rearrangement of intra-cellular stress fibers due to energy dissipation and the fluctuations in the ionic exchange mechanisms such as the depolarization of voltage gated channels [50]. Nevertheless, there is no significant change in cell morphology and orientation was observed

when  $Gd^{3+}$  was added, indicating that cyclic loading may play an important role in deciding the fate of cell behaviour.

As mentioned previously, one of the earliest effected signalling mechanisms is the fluctuation in intracellular calcium. Rise in intracellular calcium can trigger the activation of the calpain family of regulatory proteases that help to drive signalling transduction pathways forward and have been linked to the initiation of downstream pro-apoptotic signalling. We studied *CAPN1* and *CAPN6*, and the results did not show any significant increase. In fact, *CAPN6* appeared to be down-regulated at 24 h and 48 h. Whilst there may be an apparent increase in gene expression, the increment at 72 h is insignificant, and could be due to cytoskeletal remodelling and signal transduction that occurs due to the mechanical stimulation process [51]. Amongst the many downstream intracellular death-signal transmitting pathways, the MAPK signalling cascade is the most studied and elucidated, and have been shown to control cell differentiation and survival [52]. *MAPK1*, also known as *ERK2* (extracellular signal-regulated kinases 2), appears to be down-regulated in long periods of culture conditions (48 h and 72 h) in our study, indicating that cell differentiation can be regulated by mechanical stimulation. Despite the diversity in pro-apoptotic signalling cascades, most cell death pathways ultimately converge with the activation of caspases [53]. Caspases are specialized proteases that are essential for the physical execution of apoptosis. Apoptosis is usually accompanied by the activation of caspase-3, which is one of the most extensively studied caspases with numerous mechanisms of activation [54], which involves activation of caspase-9 [55]. Once activated, caspase-3 is directly involved in the sustained induction of DNA damage and the disruption of DNA repair mechanisms. Although *CASP3* increased at 72 h, the increase was non-significant, which suggest that blocking of SACC and with uniaxial stretching does not induced apoptosis mediated cell death. Expression of the pro-apoptotic Bax protein and mitochondrial dysfunction also mediate apoptosis following mechanical stress [56]. This gene expression was down-regulated when mechanical stretching was applied on SACC-inhibited MSCs, demonstrating that mechanical stretching at 1 Hz + 8% did not induce MSCs cell death. Indeed, there is a significant decrease in nuclei count for SACC-inhibited strained cells. However, since there is no apoptosis occurs in this group, we assume that the decrease in nuclei count was due to partial oxidative stress. This was confirmed from the gene expression analysis which revealed a down-regulation of *GPX1* and *SOD1*. This suggests that reduction in these 2 genes may result in excessive reactive oxygen species (ROS) production in SACC-inhibited cells under cyclic stretch. *GPX1* is ubiquitously expressed in many tissues, where it protects cells from oxidative stress. The *SOD1* enzyme is an important constituent in apoptotic signalling and oxidative stress [57]. *SOD1* inhibits apoptosis by interacting with BCL-2 proteins or the mitochondria itself [58], where was also shown in our gene expression analysis. Study of Tan et al [59] revealed that decreased osteogenesis of adult MSCs by ROS under cyclic stretch by down-regulation of *SOD1*, and proposed manipulation of the cells with antioxidant would improve their osteogenic ability. Blocking SACCs with gadolinium does not appear to protect cells against strain induced apoptosis, indicating that these channels are not involved in the up-regulation of apoptotic pathways in hMSCs. Similar findings were mentioned elsewhere [60].

When reviewing similar studies we note that other than stretching, which was used in the present study, other loading modalities such as tension, compression, fluid flow, and osmotic pressure [28, 44, 61–62], appears to be dependent on  $Ca^{2+}$  signalling as well. This indicates that mechanotransduction for tensile loading in hMSCs may be necessary. This was evidenced by the lack of a response to the mechanical load when intracellular calcium was chelated. SACCs play a key role in the mechanoresponse of MSCs to tension, compression, and fluid flow [27–28]; yet, in the current study, their inhibition did not fully suppress the mechanoresponse of the MSCs. These results suggest that the mechanotransductive pathways utilised by

MSCs in response to uniaxial tensile loading are distinctive from those used to sense and respond to other loading modalities.

Cells, including MSCs and tenocytes appear to share elements of a load-sensing mechanism similar to osteoblasts and osteocytes; stretch-activated potassium and calcium channels, internal calcium release, interstitial ATP release, and gap junction signalling. These appear to play a role in the proliferative response to membrane deformation, substrate deformation, or fluid shear [63]. A key requirement to triggering the intracellular calcium response in cells under tensile loading is that the calcium must be included in the flow medium, otherwise, the flow by itself does not activate the cells [64–65]. Calcium efflux which occurs locally into cells can potentially alter the osmotic pressure around the hMSCs. Such changes in osmotic pressure might also be responsible for activating the cell by SACC [64, 66–67]. The osmotic effects may come into play by the opening of the SACC to allow the influx of extracellular calcium into the cytoplasm of the cells. The total amplitude of intracellular calcium response elicited by the  $\text{Ca}^{2+}$  supplemented medium however cannot be explained solely by the increase in the osmotic pressure. In another study, it was demonstrated that gadolinium did not affect the intracellular response in osteoblast [68], which further suggests that SACC is not essential in the mechanisms by which osteoblasts detect the elevation of concentration of calcium. Again, this suggests that differences in cell types may lead to different responses.

Results show that supplementing gadolinium ion into cell cultures reduced the tenogenic differentiation of strained hMSCs. Treatment with this blocker had no effect on unstrained cells, but prevented the increase in signalling associated with cyclic stretching, and eventually influences the cell response. This finding has clear implications on the relationships between calcium with its role in actomyosin contraction of stress fibres, and calcium signalling during tensile loading at 1 Hz + 8% strain. Previous studies in which gadolinium inhibited mechanically induced calcium signalling in mechanically stimulated cells appears to have been observed previously [28, 47, 69]. It is not clear from our literature search as to whether an agonist is available for enhancing the SACC function, which contrasts with the function of gadolinium. If there are, it may not be useful if this can regulate the SACC function positively, thus imitating or even enhance the process of mechanotransduction via chemical methods.

## Conclusions

The results of our study demonstrate that SACC blocker used concurrently with uniaxial stretching partially affects tenogenic differentiation and at prolonged periods, induce cell death. However, the cell death is not apoptosis mediated but could be related to decline in the antioxidant markers. In addition, tenogenic differentiation of bone marrow stromal cells may likely be dependent on calcium stretch-activated channels, especially within the first 24 hours. Using this knowledge, we can therefore assume that future studies looking at manipulating calcium signals via SACC using chemical or mechanical means can be used for enhancing cell differentiation for potential tissue engineering purposes.

## Acknowledgments

This work was supported by High Impact Research—Ministry of Education, HIR-MoE Grant (Reference number—UM.C/625/1/HIR/ MOHE/CHAN/03, account number - A000003-50001). We also thank the University of Malaya for a PhD thesis scholarship for the first author.



## Author Contributions

**Conceptualization:** HYN HRBR TK BPM.

**Formal analysis:** HYN.

**Funding acquisition:** TK HRBR.

**Investigation:** HYN.

**Methodology:** HYN HRBR TK BPM.

**Resources:** AAA AMM TK.

**Supervision:** TK HRBR BPM.

**Visualization:** HYN.

**Writing – original draft:** HYN.

**Writing – review & editing:** TK HRBR BPM.

## References

1. Dook JE, James C, Henderson NK, Price RI. Exercise and bone mineral density in mature female athletes. *Med Sci Sports Exerc.* 1997; 29: 291–296. PMID: [9139166](#)
2. Killian ML, Cavinatto L, Galatz LM, Thomopoulos S. The role of mechanobiology in tendon healing. *J Shoulder Elbow Surg.* 2012; 21: 228–237. <https://doi.org/10.1016/j.jse.2011.11.002> PMID: [22244066](#)
3. Massoud EI. Healing of subcutaneous tendons: Influence of the mechanical environment at the suture line on the healing process. *World J Orthop.* 2013; 4: 229–240. <https://doi.org/10.5312/wjo.v4.i4.229> PMID: [24147258](#)
4. Wang JHC. Mechanobiology of tendon. *J Biomech.* 2006; 39: 1563–1582. <https://doi.org/10.1016/j.jbiomech.2005.05.011> PMID: [16000201](#)
5. Chuen FS, Chuk CY, Ping WY, Nar WW, Kim HL, Ming CK. Immunohistochemical characterization of cells in adult human patellar tendons. *J Histochem Cytochem.* 2004; 52: 1151–1157. <https://doi.org/10.1369/jhc.3A6232.2004> PMID: [15314082](#)
6. Yao L, Bestwick CS, Bestwick LA, Maffulli N, Aspden RM. Phenotypic drift in human tenocyte culture. *Tissue Eng.* 2006; 12: 1843–1849. <https://doi.org/10.1089/ten.2006.12.1843> PMID: [16889514](#)
7. Docheva D, Müller SA, Majewski M, Evans CH. Biologics for tendon repair. *Adv Drug Deliv Rev.* 2015; 84: 222–239. <https://doi.org/10.1016/j.addr.2014.11.015> PMID: [25446135](#)
8. Bullough R, Finnigan T, Kay A, Maffulli N, Forsyth NR. Tendon repair through stem cell intervention: cellular and molecular approaches. *Disabil Rehabil.* 2008; 30: 1746–1751. <https://doi.org/10.1080/09638280701788258> PMID: [18720123](#)
9. Tonelli FM, Santos AK, Gomes DA, da Silva SL, Gomes KN, Ladeira LO, Resende RR. Stem cells and calcium signaling. *Adv Exp Med Biol.* 2012; 740: 891–916. [https://doi.org/10.1007/978-94-007-2888-2\\_40](https://doi.org/10.1007/978-94-007-2888-2_40) PMID: [22453975](#)
10. Upadhyay RK. Role of regeneration in tissue repairing and therapies. *J Regen Med Tissue Eng.* 2015; 4: 1.
11. Berridge MJ, Lipp P, Bootman MD. The versatility and universality of calcium signalling. *Nat Rev Mol Cell Biol.* 2000; 1: 11–21. <https://doi.org/10.1038/35036035> PMID: [11413485](#)
12. Bootman MD, Collins TJ, Peppiatt CM, Prothero LS, MacKenzie L, De Smet P, Travers M, et al. Calcium signalling—an overview. *Semin Cell Dev Biol.* 2001; 12: 3–10. <https://doi.org/10.1006/scdb.2000.0211> PMID: [11162741](#)
13. Wall ME, Banes AJ. Early responses to mechanical load in tendon: role for calcium signaling, gap junctions and intercellular communication. *J Musculoskelet Neuronal Interact.* 2005; 5: 70–84. PMID: [15788873](#)
14. Kawano S, Shoji S, Ichinose S, Yamagata K, Tagami M, Hiraoka M. Characterization of Ca(2+) signaling pathways in human mesenchymal stem cells. *Cell Calcium.* 2002; 32: 165–174. PMID: [12379176](#)

15. Kim TJ, Sun J, Lu S, Qi YX, Wang Y. Prolonged mechanical stretch initiates intracellular calcium oscillations in human mesenchymal stem cells. *PLoS One*. 2014; 9: e109378. <https://doi.org/10.1371/journal.pone.0109378> PMID: 25329052
16. Nowycky MC, Thomas AP. Intracellular calcium signaling. *J Cell Sci*. 2002; 115: 3715–3716. PMID: 12235281
17. Banes AJ, Lee G, Graff R, Otey C, Archambault J, Tsuzaki M, et al. Mechanical forces and signalling in connective tissue cells: cellular mechanisms of detection, transduction, and responses to mechanical deformation. *Curr Opin Orthop*. 2001; 12: 389–396.
18. Clapham DE. Calcium signaling. *Cell*. 2007; 131: 1047–1058. <https://doi.org/10.1016/j.cell.2007.11.028> PMID: 18083096
19. Nam HY, Pingguan-Murphy B, Abbas AA, Merican AA, Kamarul T. The proliferation and tenogenic differentiation potential of bone marrow-derived mesenchymal stromal cell are influenced by specific uniaxial cyclic tensile loading conditions. *Biomech Model Mechanobiol*. 2015; 14: 649–663. <https://doi.org/10.1007/s10237-014-0628-y> PMID: 25351891
20. Thompson WR, Rubin CT, Rubin J. Mechanical regulation of signaling pathways in bone. *Gene*. 2012; 503: 179–193. <https://doi.org/10.1016/j.gene.2012.04.076> PMID: 22575727
21. Wang EC, Lee JM, Johnson JP, Kleyman TR, Bridges R, Apodaca G. Hydrostatic pressure-regulated ion transport in bladder uroepithelium. *Am J Physiol Renal Physiol*. 2003; 285: 651–663.
22. Nam HY, Karunanithi P, Loo WCP, Naveen SV, Chen HC, Hussin P, et al. The effects of staged intra-articular injection of cultured autologous mesenchymal stromal cells on the repair of damaged cartilage: a pilot study in caprine model. *Arthritis Res Ther*. 2013; 15: R129. <https://doi.org/10.1186/ar4309> PMID: 24286235
23. Cigognini D, Lomas A, Kumar P, Satyam A, English A, Azeem A, et al. Engineering *in vitro* microenvironments for cell based therapies and drug discovery. *Drug Discov Today*. 2013; 18: 1099–1108. <https://doi.org/10.1016/j.drudis.2013.06.007> PMID: 23806976
24. Costa P, Almeida FV, Connelly JT. Biophysical signals controlling cell fate decisions: how do stem cells really feel? *Int J Biochem Cell Biol*. 2012; 44: 2233–2237. <https://doi.org/10.1016/j.biocel.2012.09.003> PMID: 22982240
25. Ge D, Liu X, Li L, Wu J, Tu Q, Shi Y, et al. Chemical and physical stimuli induce cardiomyocyte differentiation from stem cells. *Biochem Biophys Res Commun*. 2009; 381: 317–321. PMID: 19309791
26. Yang XC, Sachs F. Block of stretch-activated ion channels in *Xenopus* oocytes by gadolinium and calcium ions. *Science*. 1989; 243: 1068–1071. PMID: 2466333
27. McMahan LA, Reid AJ, Campbell VA, Prendergast PJ. Regulatory effects of mechanical strain on the chondrogenic differentiation of MSCs in a collagen-GAG scaffold: experimental and computational analysis. *Ann Biomed Eng*. 2008; 36: 185–194. <https://doi.org/10.1007/s10439-007-9416-5> PMID: 18080835
28. Mobasheri A, Carter SD, Martín-Vasallo P, Shakibaei M. Integrins and stretch activated ion channels: putative components of functional cell surface mechanoreceptors in articular chondrocytes. *Cell Biol Int*. 2002; 26: 1–18. <https://doi.org/10.1006/cbir.2001.0826> PMID: 11779216
29. Wright MO, Nishida K, Bavington C, Godolphin JL, Dunne E, Walmsley S, et al. Hyperpolarisation of cultured human chondrocytes following cyclical pressure-induced strain: Evidence of a role for  $\alpha 5 \beta 1$  integrin as a chondrocyte mechanoreceptor. *J Orthop Res*. 1997; 15: 742–747. <https://doi.org/10.1002/jor.1100150517> PMID: 9420605
30. Kawano S, Shoji S, Ichinose S, Yamagata K, Tagami M, Hiraoka M. Characterization of Ca(2+) signaling pathways in human mesenchymal stem cells. *Cell Calcium*. 2002; 32: 165–174. PMID: 12379176
31. Hamill OP, Martinac B. Molecular basis of mechanotransduction in living cells. *Physiol Rev*. 2001; 81: 685–740. PMID: 11274342
32. Ruknudin A, Sachs F, Bustamante JO. Stretch-activated ion channels in tissue-cultured chick heart. *Am J Physiol*. 1993; 264: 960–972.
33. Banes AJ, Lee G, Graff R, Otey C, Archambault J, Tsuzaki M, et al. Mechanical forces and signalling in connective tissue cells: cellular mechanisms of detection, transduction, and responses to mechanical deformation. *Curr Opin Orthop*. 2001; 12: 389–396.
34. McKayed KK, Prendergast PJ, Campbell VA, Gowran A. Mesenchymal stem cells: role of mechanical strain in promoting apoptosis and differentiation. In: Hayat MA, editor. *Stem cells and cancer stem cells*. Netherlands: Springer; 2012. pp. 199–206.
35. Banes AJ, Weinhold P, Yang X, Tsuzaki M, Bynum D, Bottlang M, et al. Gap junctions regulate responses of tendon cells *ex vivo* to mechanical loading. *Clin Orthop Relat Res*. 1999; 367: 356–370.

36. Maeda T, Sakabe T, Sunaga A, Sakai K, Rivera AL, Keene DR, et al. Conversion of mechanical force into TGF- $\beta$ -mediated biochemical signals. *Curr Biol*. 2011; 21: 933–941. <https://doi.org/10.1016/j.cub.2011.04.007> PMID: 21600772
37. Liu YK, Lu QZ, Pei R, Ji HJ, Zhou GS, Zhao XL, et al. The effect of extracellular calcium and inorganic phosphate on the growth and osteogenic differentiation of mesenchymal stem cells *in vitro*: implication for bone tissue engineering. *Biomed Mater*. 2009; 4: 025004. <https://doi.org/10.1088/1748-6041/4/2/025004> PMID: 19208939
38. Coirault C, Sauviat MP, Chemla D, Pourny JC, Lecarpentier Y. The effects of gadolinium, a stretch-sensitive channel blocker, on diaphragm muscle. *Eur Respir J*. 1999; 14: 1297–1303. PMID: 10624758
39. Hamill OP, McBride DW. The pharmacology of mechanogated membrane ion channels. *Pharmacol Rev*. 1996; 48: 231–252. PMID: 8804105
40. Khatib L, Golan DE, Cho M. Physiologic electrical stimulation provokes intracellular calcium increase mediated by phospholipase C activation in human osteoblasts. *FASEB J*. 2004; 18: 1903–1905. <https://doi.org/10.1096/fj.04-1814fje> PMID: 15385433
41. Wedhas N, Klamut HJ, Dogra C, Srivastava AK, Mohan S, Kumar A. Inhibition of mechanosensitive cation channels inhibits myogenic differentiation by suppressing the expression of myogenic regulatory factors and caspase-3 activity. *FASEB J*. 2005; 19: 1986–1997. <https://doi.org/10.1096/fj.05-4198com> PMID: 16319142
42. Boudreault F, Grygorczyk R. Cell swelling-induced ATP release and gadolinium-sensitive channels. *Am J Physiol Cell Physiol*. 2002; 282: 219–226.
43. Kearney EM, Prendergast PJ, Campbell VA. Mechanisms of strain-mediated mesenchymal stem cell apoptosis. *J Biomech Eng*. 2008; 130: 061004. <https://doi.org/10.1115/1.2979870> PMID: 19045533
44. Pingguan-Murphy B, Lee DA, Bader DL, Knight MM. Activation of chondrocytes calcium signalling by dynamic compression is independent of number of cycles. *Arch Biochem Biophys*. 2005; 444: 45–51. <https://doi.org/10.1016/j.abb.2005.09.015> PMID: 16289021
45. Salameh A, Dhein S. Effects of mechanical forces and stretch on intercellular gap junction coupling. *Biochim Biophys Acta*. 2013; 1828: 147–156. <https://doi.org/10.1016/j.bbame.2011.12.030> PMID: 22245380
46. Yano S, Komine M, Fujimoto M, Okochi H, Tamaki K. Mechanical stretching *in vitro* regulates signal transduction pathways and cellular proliferation in human epidermal keratinocytes. *J Invest Dermatol*. 2004; 122: 783–790. <https://doi.org/10.1111/j.0022-202X.2004.22328.x> PMID: 15086566
47. Caldwell RA, Clemo HF, Baumgarten CM. Using gadolinium to identify stretch-activated channels: technical considerations. *Am J Physiol*. 1998; 275: 619–621.
48. Jang JY, Lee SW, Park SH, Shin JW, Mun C, Kim SH, et al. Combined effects of surface morphology and mechanical straining magnitudes on the differentiation of mesenchymal stem cells without using biochemical reagents. *J Biomed Biotechnol*. 2011; 860652. <https://doi.org/10.1155/2011/860652> PMID: 21403908
49. Park JS, Chu JS, Cheng C, Chen F, Chen D, Li S. Differential effects of equiaxial and uniaxial strain on mesenchymal stem cells. *Biotechnol Bioengin*. 2004; 88: 359–368.
50. Wang JH, Grood ES. The strain magnitude and contact guidance determine orientation response of fibroblasts to cyclic substrate strains. *Connect Tissue Res*. 2000; 41: 29–36. PMID: 10826706
51. Lebart MC, Benyamin Y. Calpain involvement in the remodeling of cytoskeletal anchorage complexes. *FEBS J*. 2006; 273: 3415–3426. <https://doi.org/10.1111/j.1742-4658.2006.05350.x> PMID: 16884487
52. Seger R, Krebs EG. The MAPK signaling cascade. *FASEB J*. 1995; 9: 726–735. PMID: 7601337
53. Blatt NB, Glick GD. Signaling pathways and effector mechanisms pre-programmed cell death. *Bioorg Med Chem*. 2001; 9: 1371–1384. PMID: 11408158
54. Jänicke RU, Ng P, Sprengart ML, Porter AG. Caspase-3 is required for alpha-fodrin cleavage but dispensable for cleavage of other death substrates in apoptosis. *J Biol Chem*. 1998; 273: 15540–15545. PMID: 9624143
55. Cain K. Chemical-induced apoptosis: formation of the Apaf-1 apoptosome. *Drug Metab Rev*. 2003; 35: 337–363. <https://doi.org/10.1081/DMR-120026497> PMID: 14705865
56. Mayr M, Hu Y, Hainaut H, Xu Q. Mechanical stress-induced DNA damage and rac-p38MAPK signal pathways mediate p53-dependent apoptosis in vascular smooth muscle cells. *FASEB J*. 2002; 16: 1423–1425. <https://doi.org/10.1096/fj.02-0042fje> PMID: 12205035
57. Danial NN, Korsmeyer SJ. Cell death: critical control points. *Cell*. 2004; 116: 205–219. PMID: 14744432
58. Rosen DR, Siddique T, Patterson D, Figlewicz DA, Sapp P, Hentati A, et al. Mutations in Cu/Zn superoxide dismutase gene are associated with familial amyotrophic lateral sclerosis. *Nature*. 1993; 362: 59–62. <https://doi.org/10.1038/362059a0> PMID: 8446170

59. Tan J, Xu X, Tong Z, Lin J, Yu Q, Lin Y, et al. Decreased osteogenesis of adult mesenchymal stem cells by reactive oxygen species under cyclic stretch: a possible mechanism of age related osteoporosis. *Bone Res.* 2015; 3: 15003. <https://doi.org/10.1038/boneres.2015.3> PMID: 26273536
60. Kearney EM, Farrell E, Prendergast PJ, Campbell VA. Tensile strain as a regulator of mesenchymal stem cell osteogenesis. *Ann Biomed Eng.* 2010; 38: 1767–1779. <https://doi.org/10.1007/s10439-010-9979-4> PMID: 20217480
61. Matthews BD, Overby DR, Mannix R, Ingber DE. Cellular adaptation to mechanical stress: role of integrins, Rho, cytoskeletal tension and mechanosensitive ion channels. *J Cell Sci.* 2006; 119: 508–518. <https://doi.org/10.1242/jcs.02760> PMID: 16443749
62. Riddle RC, Taylor AF, Genetos DC, Donahue HJ. MAP kinase and calcium signaling mediate fluid flow-induced human mesenchymal stem cell proliferation. *Am J Physiol Cell Physiol.* 2006; 290: 776–784.
63. Scott A, Cook JL, Hart DA, Walker DC, Duronio V, Khan KM. Tenocyte responses to mechanical loading *in vivo*: a role for local insulin-like growth factor 1 signaling in early tendinosis in rats. *Arthritis Rheum.* 2007; 56: 871–881. <https://doi.org/10.1002/art.22426> PMID: 17328060
64. Hung CT, Allen FD, Pollack SR, Brighton CT. Intracellular Ca<sup>2+</sup> stores and extracellular Ca<sup>2+</sup> are required in the real-time Ca<sup>2+</sup> response of bone cells experiencing fluid flow. *J Biomech.* 1996; 29: 1411–1417. PMID: 8894921
65. Huo B, Lu XL, Guo XE. Intercellular calcium wave propagation in linear and circuit-like bone cell networks. *Philos Trans A Math Phys Eng Sci.* 2010; 368: 617–633. <https://doi.org/10.1098/rsta.2009.0221> PMID: 20047942
66. Miyauchi A, Notoya K, Mikuni-Takagaki Y, Takagi Y, Goto M, Miki Y, et al. Parathyroid hormone-activated volume-sensitive calcium influx pathways in mechanically loaded osteocytes. *J Biol Chem.* 2000; 275: 3335–3342. PMID: 10652322
67. Sun X, McLamore E, Kishore V, Fites K, Slipchenko M, Porterfield DM, et al. Mechanical stretch induced calcium efflux from bone matrix stimulates osteoblasts. *Bone.* 2012; 50: 581–591. <https://doi.org/10.1016/j.bone.2011.12.015> PMID: 22227434
68. Sun X, Kishore V, Fites K, Akkus O. Osteoblasts detect pericellular calcium concentration increase via neomycin-sensitive voltage gated calcium channels. *Bone.* 2012; 51: 860–867. <https://doi.org/10.1016/j.bone.2012.08.116> PMID: 22921901
69. Park JY, Lee D, Maeng JU, Koh DS, Kim K. Hyperpolarization, but not depolarization, increases intracellular Ca<sup>2+</sup> level in cultured chick myoblasts. *Biochem Biophys Res Commun.* 2002; 290: 1176–1182. <https://doi.org/10.1006/bbrc.2001.6323> PMID: 11811986
